# Supplementary material
Source: publisher figshare collection journal article supplement (https://rs.figshare.com/ndownloader/files/23890672)
Supplement: Supplementary file 1 [file 23890672]

## Sheet: Sheet1
Core	Depth (cm)	Fe Asc %	P-Fe assoc (%)
19-19	0.5	0.236918	0.0108696
19-19	1.5	0.398424	0.0186085
19-19	2.5	0.547407	0.0335664
19-19	3.5	0.402065	0.0294613
19-19	4.5	0.167592	0.0166192
19-19	4.5	0.21339	0.0168841
19-19	4.5	0.173667	0.0169898
19-19	6.5	0.0869002	0.00615768
19-19	8.5	0.0495395	0.0026512
19-19	10.5	0.0502685	0.00272502
27-15	0.5	0.0904683	0.00419666
27-15	1.5	0.0674886	0.00501213
27-15	2.5	0.0737074	0.00525732
27-15	4.5	0.0662616	0.00361037
31-13	0.5	0.0538605	0.00294902
31-13	1.5	0.0419704	0.0043407
31-13	2.5	0.0474481	0.0030074
31-13	3.5	0.0434751	0.00270138
31-13	4.5	0.0372369	0.00262058
39-5	0.5	0.217883	0.00694901
39-5	1.5	0.227662	0.00716797
39-5	2.5	0.227381	0.00685762
39-5	4.5	0.23749	0.00749226
40-1	0.5	0.203946	0.00682373
40-1	1.5	0.232773	0.00743056
40-1	2.5	0.220915	0.0072758
40-1	4.5	0.226188	0.00771203
43-20	0.5	0.132122	0.00679887
43-20	1.5	0.136723	0.00595581
43-20	2.5	0.172604	0.00539116
43-20	3.5	0.118279	0.00819838
43-20	4.5	0.0912747	0.00413902
46-15	0.5	0.206481	0.00622265
46-15	1.5	0.208295	0.00667228
46-15	2.5	0.215559	0.00660643
46-15	4.5	0.21668	0.00701667
47-20	0.5	0.275184	0.00723153
47-20	1.5	0.330099	0.00749451
47-20	2.5	0.258055	0.0075
47-20	4.5	0.293676	0.00769703
56-15	0.5	0.186495	0.00608451
56-15	1.5	0.202084	0.00659197
56-15	2.5	0.203983	0.00715713
56-15	4.5	0.208539	0.0062167
